# Supplementary material
Source: Elsevier journal article supplement (https://comptes-rendus.academie-sciences.fr/chimie/article/10.1016/j.crci.2008.10.010/file/attach/mmc1.pdf)
Supplement: mmc1 [file mmc1.pdf]

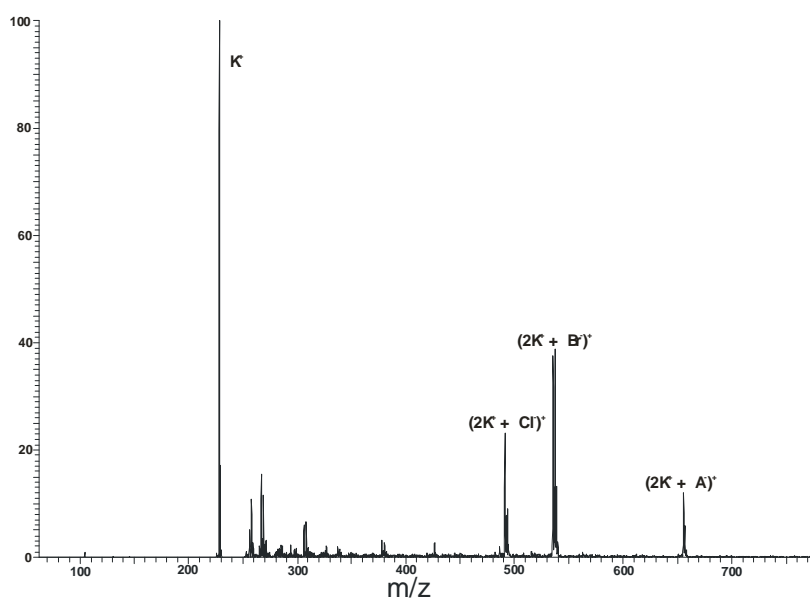

**Figure S1:** Binding of chloride ions as determined by ES-MS; 15 mM of NaCl was added to a SL / DTAB micellar solution. A<sup>-</sup> : dodecylcarboxylate anion (199 Da); K<sup>+</sup> : dodecyltrimethylammonium cation (228 Da); the peaks between 250 and 300 (*m/z*) are noise due to the solvent.
